# Supplementary material for: Systematic manipulation of surface chemical reaction on the nanoscale: a novel approach for constructing three-dimensional nanostructuresElectronic supplementary information (ESI) available: experimental details. See http://www.rsc.org/suppdata/cc/b2/b211906d/
Source: Royal Society of Chemistry journal article supplement (doi:10.1039/b211906d), 2003-01-20
Supplement: b211906d.doc [file b211906d.doc]

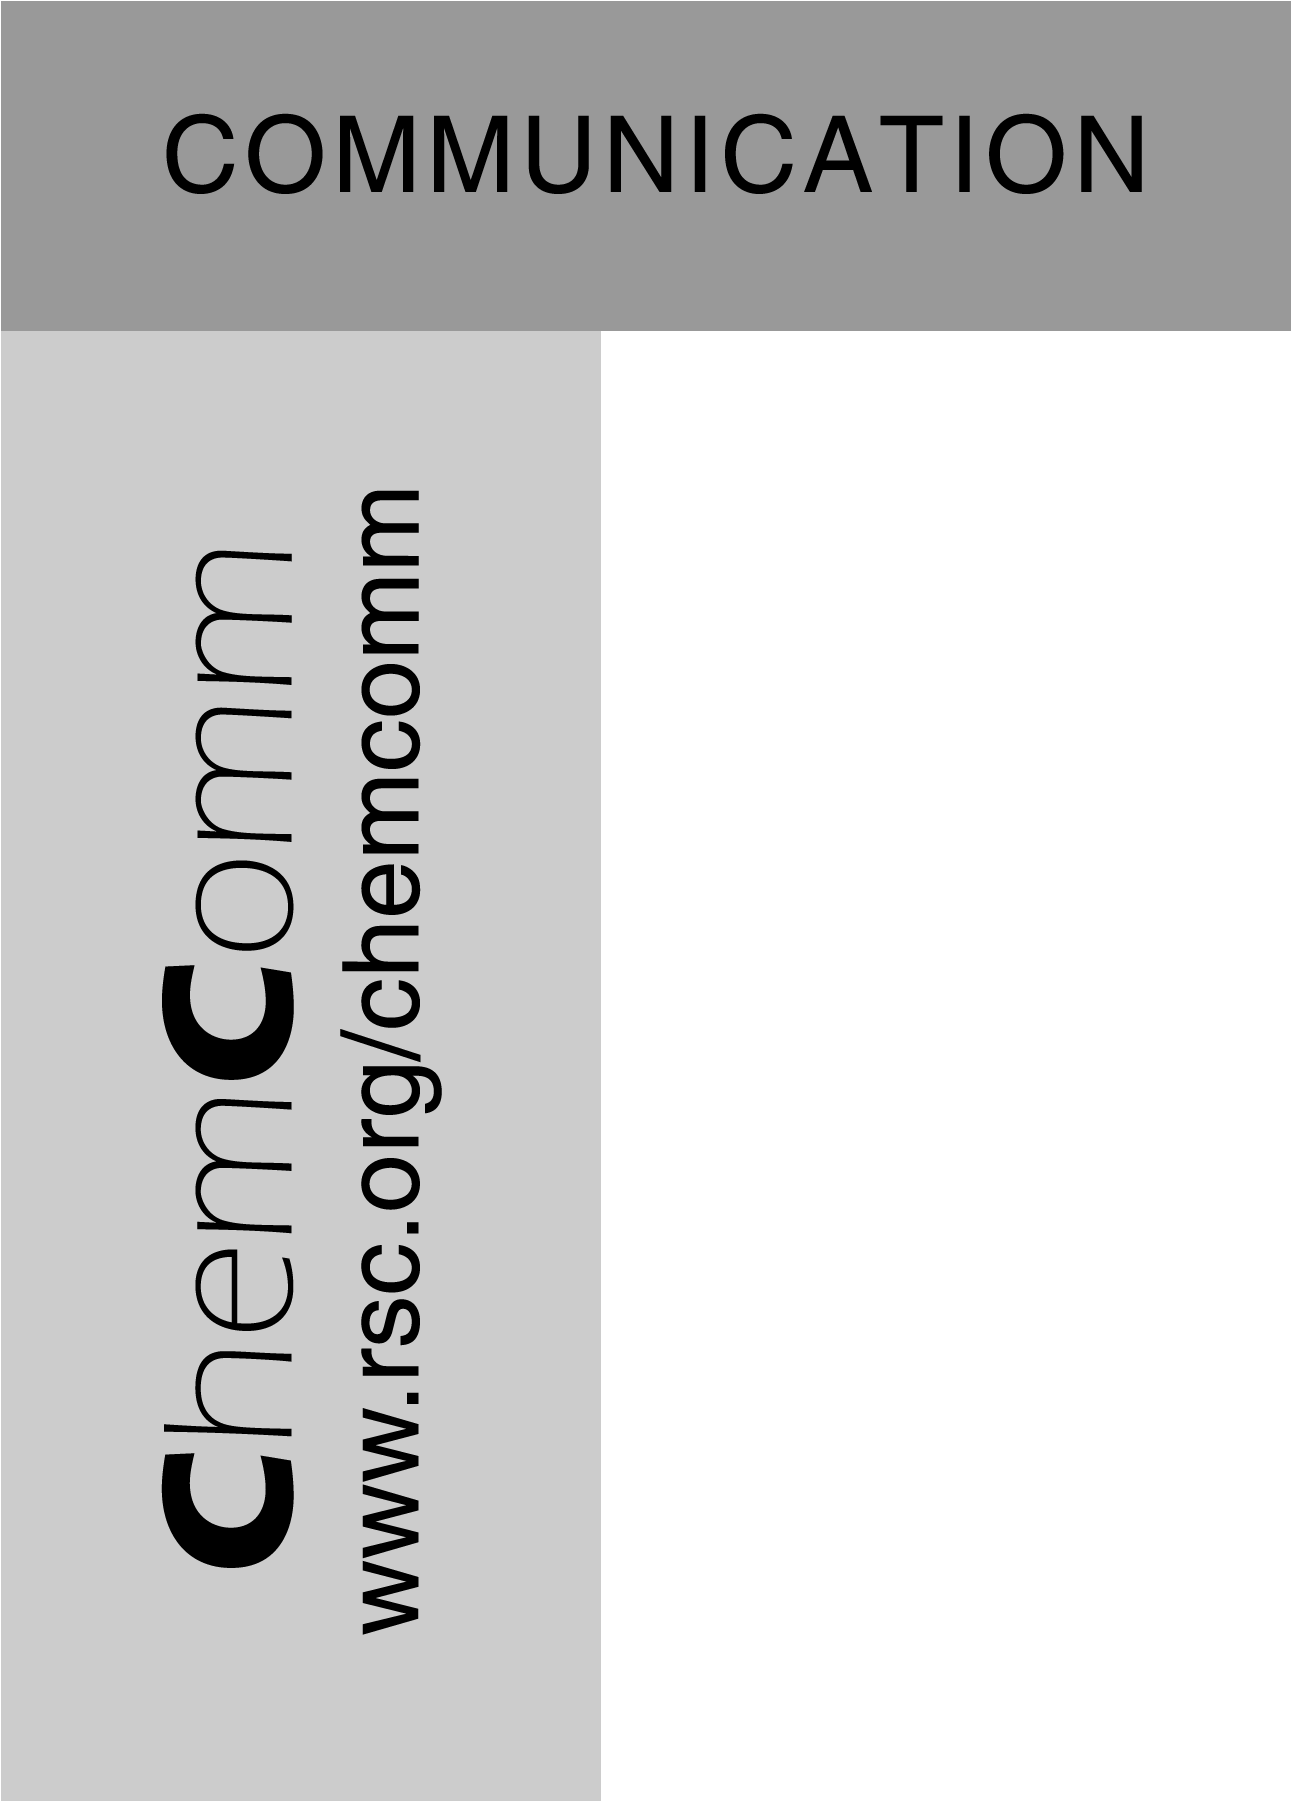
Systematic nanoscale manipulation of surface reactions: a novel approach for constructing three dimensional nanostructures

Xiuzhu Wang, Dejian Zhou, Trevor Rayment and Chris Abell*

Department of Chemistry, University of Cambridge, Lensfield Road, Cambridge CB2 1EW. E-mail: [ca26@cam.ac.uk](mailto:ca26@cam.ac.uk); Fax: 01223 336362; Tel: 01223 336405

**Supplementary materials**

**Experimental details**

**Materials and Synthesis**

All of the chemicals and solvents, 2-butanol, 11-mercaptoundecanol (98%), triphenyl phosphine, maleimide (99%), diethyl azodicarboxylate (DEAD), *N*, *N*-diisopropylethylamine, decanethiol (98%), *P*-xylylenediamine were purchased from Aldrich Chemical Company.

The synthesis of **1** is schematically described below:

Synthesis of 11,11’-dihydroxylundecyldisulfide

11-Mercaptoundecanol (0.40 g, 1.9 mmol) was dissolved in EtOH (15 mL), treated with 2N NaOH (10 mL) and stirred at room temperature for 5 days with constant O2 bubbling. After which the solvent was removed under reduced pressure. Aqueous 3N HCl (6.7 mL) was then added to the mixture and the resulting slurry was extracted with ethyl acetate (3 × 10 mL). The organic extract was washed with brine (10 mL), dried over MgSO4 and concentrated under reduced pressure to afford the *disulfide* (0.38 g, 96%) as a white solid. Rf (hexane/EtOAc 1:2) 0.3. 1H NMR (400 MHz, CDCl3)  ppm: 3.65 (4H, t, *J* 7 Hz, CH2OH), 2.67 (4H, t, *J* 7 Hz, CH2SSCH2), 1.7-1.2 (36H, m, CH2).

Synthesis of **1:**

To a solution of 11, 11’-dihydroxylundecyldisulfide (0.40 g, 1 mmol) and triphenyl phosphine (0.56 g, 2.2 mmol) in dry THF (10 mL) was added DEAD (0.34 mL, 2.2 mmol) dropwisely. After 5 minutes, maleimide (0.2 g, 2.2 mmol) in dry THF (3 mL) was added, and the resulting solution was stirred overnight. The solvent was then removed under reduced pressure and the residue was extracted with dichloromethane (DCM). The organic layer was washed with brine, dried over MgSO4, and evaporated to dryness to yield a yellow solid. Purification by column chromatography on silica gel (hexane/EtOAc 2:1) yielded **1** (0.33 g, 63%) as a white solid. Rf (hexane/EtOAc 2:1) 0.4. IR max (CHCl3)/cm-1, 3019, 2926, 2854, 1770 (C=O), 1704. 1H NMR (400 MHz, CDCl3)  ppm: 6.69 (4H, s, ring H), 3.49 (4H, t, *J* 7 Hz, CH2N), 2.67 (4H, t, *J* 7 Hz, CH2SSCH2), 1.7-1.2 (36H, m, CH2); 13C NMR (100 MHz, CDCl3)  ppm: 170.8 (C=O), 133.8 (C=C), 38.9, 37.7, 29.2 , 28.9, 28.8, 28.4, 26.6; HRMS calcd for C15H25O2NSNa+ (M+Na) + 306.1504, found 306.1511.

**AFM experiments**

All of the AFM experiments were carried out on a Digital Instrument (DI, Santa Babara, CA, USA) Dimension 3100 AFM with a Nanoscope IV controller, and all the images were collected with a customer made fluid cell under 2-butanol at 24  1 ºC. Oxide sharpened Si3N4 microlevers (DI) with norminal spring constant of 0.58 N/m were used in all the image collection and nanografting experiments. Images were collected at a scan rate of 2 Hz and at a scan angle of 90º. The captured images were analysed with the DI image analysing software using first order flattening, and no other modifications to the images were applied.

To calculate the volume increase of the nanosquare after each chemical manipulation step, we used the following assumptions: (1) the volume increase within the nanosquare was attributed solely to chemical attachment of the reactants, *i.e.* no non-specific adsorption of the reagents; (2) within the maleimide nanostructure created by nanografting, all the maleimidoundecyl thiolate molecules adopted a compact packing with all the thiol head groups occupied the 3 fold hollow sites on the Au(111) surface.1 The number of available reactive sites (the maleimido groups) within the nanosquare was then estimated by using the pattern area divided by the area occupied by each thiol head group. The volume increase was calculated by using the pattern area (400 × 400 nm2) times the averaged increase in height. As the aspect ratio of the nanostructure is very small, tip convolution effects should be negligible. The yield is defined as the ratio of volume increase in each step relative to the theoretical maximum (the number of the maximum active groups times the van der Waals volume of each reactant).

The nanografting procedure was the same as that in the literature:1,2 At first, a sample of decanethiol SAM on TSG2 was imaged under a low loading force (typically in the range of 0.5-1 nN, just enough to obtain a stable image) under a 5 mM 2-butanol solution of **1**. Then a suitable small area (400 × 400 nm2) was selected for the nanografting. The selected small area was repeatedly scanned under a high loading force (*i.e.*, 100-150 nN) to scrape away the decanethiol SAM resist, and at the same time, the molecules of **1** in the solution follow the shaving track to the AFM tip to fill the freshly exposed gold surface by self-assembly to form a SAM terminating with maleimide groups. The nanografting was conducted at a scan rate of 5Hz, and typically 3-6 scans were applied to completely replace the decanethiol SAM with the maleimide. After the nanografting, the AFM tip was completely withdrawn from the surface by decreasing the deflection set point, the scan rate was set to 2Hz, for a larger scan area, and then the deflection set point was increased to re-engage the tip with the minimum loading force required to take the topographic image.

After each step of the chemical manipulation, the remaining solution was removed from the fluid cell, then the surface was thoroughly washed with 2-butanol before the desired new solution was introduced into the fluid cell and incubated.

**Surface roughness**

The surface roughness (Rms) for the nanostructures was measured by using the DI image analysing software after first order flattening. The value is, 0.18 nm for decanethiol SAM before nanografting, increases to 0.31 nm after nanografting (**Fig. 1b**), further increases to 0.80 nm after reacting with *p*-xylylenediamine (**Fig. 1c**), increases to 1.02 nm after treatment with **1** (**Fig. 1e**), and finally decreases to 0.89 nm after treatment with decanethiol (**Fig. 1f**). Surface roughness data suggest that the reaction does not proceed homogenously, which result in domain growing within the nanografted area as seen from the topographic images

**Ellipsometry measurements**

Thicknesses of the SAMs on TSG were measured on an EL X-02C ellipsometer (DRE, Germany) at an incident angle of 70º using a He-Ne laser at 632.8 nm. The refractive indexes of the TSG substrates were first measured and calculated with a two-phase parallel-layer model (gold/air) from classical electromagnetic theory. After SAM formation, the samples were analyzed and the thicknesses of the organic film were determined from a three-phase model (gold/organic/air). A real refractive index of 1.45 (the imaginary refractive index part was set to zero since these compounds are transparent at 632.8 nm) for the organic film and the previously measured refractive indexes for the TSG substrate were used to evaluate the film thickness.3

**Reference:**

1 G.Y. Liu, S. Xu and Y. L. Qian, *Acc. Chem. Res*. 2000, **33**, 457.

2 D. Zhou, K. Sinniah, C. Abell and T. Rayment, *Langmuir*, 2002, **18**, 8278.

3 C.D. Bain, E.B. Troughton, Y.T. Tao, J. Evall, G.M. Whitesides, R. G. Nuzzo, *J. Am. Chem. Soc.*, 1989, **111**, 321.
